# 1 Understanding the Drivers of Submicroscopic Malaria Infection: Updated Insights from A 2 Systematic Review of Population Surveys

3 Charles Whittaker<sup>1</sup>, Hannah C Slater<sup>1</sup>, Teun Bousema<sup>2</sup>, Chris Drakeley<sup>3</sup>, Azra Ghani<sup>1</sup> and Lucy C Okell<sup>1</sup>

4 <sup>1</sup>MRC Centre for Global Infectious Disease Analysis, Department of Infectious Disease  
5 Epidemiology, Imperial College London, London, United Kingdom

6 <sup>2</sup>Department of Medical Microbiology, Radboud University Medical Center, Nijmegen, The  
7 Netherlands

8 <sup>3</sup>Department of Immunology and Infection, Faculty of Infectious and Tropical Diseases,  
9 London School of Hygiene and Tropical Medicine, London, United Kingdom

10

11 **Background:** Adoption of molecular techniques to detect *Plasmodium falciparum* infection has revealed many  
12 previously undetected (yet transmissible) low-density infections in areas of low malaria transmission. In a world  
13 where numerous countries are approaching elimination, additional data from low transmission areas are  
14 required to better understand the determinants of submicroscopic infection and their potential relevance in  
15 these settings.

16 **Methods:** We updated a systematic review of studies assessing asexual *P. falciparum* prevalence by microscopy  
17 and PCR in the same population. PubMed and Web of Science databases were searched up to July 2017. Bayesian  
18 regression modelling was used to explore determinants of the size of the submicroscopic reservoir across  
19 endemic populations and define when and where submicroscopic infections are likely to be most relevant to  
20 malaria control efforts.

21 **Findings:** A total of 105 references containing 387 microscopy/PCR prevalence pairs were included. Our results  
22 highlight marked geographical variation in the proportion of submicroscopically infected individuals across  
23 settings, with the submicroscopic reservoir largest in regions with historically low levels of transmission and  
24 smaller in areas that have only more recently reduced transmission. Age was also a significant determinant, with  
25 submicroscopic infection more likely in adults than infants (0-5 years) and older children (5-15 years), although  
26 we did not observe a statistically significant influence of seasonality. Integrating these results with estimates of  
27 infectivity in relation to parasite density suggests the contribution of this submicroscopic infections to  
28 transmission across different settings is likely to be highly variable.

29 **Interpretation:** Significant variation in the prevalence of submicroscopic infection exists even across settings  
30 characterised by similar current levels of transmission. These differences in submicroscopic epidemiology  
31 potentially warrant different approaches to targeting this infected sub-group in the approach to elimination.

32 **Funding:** None

33

## 1 **Research in Context:**

2 **Evidence before this study:** Cross-sectional studies of malaria prevalence in endemic populations have revealed  
3 the widespread presence of infections with parasite densities lower than the threshold of detection by  
4 microscopy. Previous systematic reviews of these surveys have highlighted that the fraction of *P.falciparum*  
5 infections missed by microscopy can be substantial (~45% of all infections detected by PCR on average), that  
6 submicroscopic infection is more likely in adults than in children (a phenomenon attributed to increased levels  
7 of immunity), and that this missed fraction (the “submicroscopic reservoir”) is typically highest in areas with low  
8 transmission intensity. Although further work is required, a number of studies have also demonstrated the  
9 capacity of these submicroscopic, low density infections to infect mosquitoes and therefore contribute to  
10 onwards transmission.

11 **Added value of this study:** Although previous studies have found that infections in older, more immune  
12 individuals are more likely to be submicroscopic, in lower transmission settings where individuals generally  
13 develop less immunity, a larger proportion of infections are also typically submicroscopic. Here we present an  
14 updated systematic review to explore this apparent paradox across a range of transmission settings and define  
15 contexts in which submicroscopic infections are likely to be most relevant to malaria control efforts. Leveraging  
16 the substantial increase in the availability of malaria cross-sectional surveys reporting prevalence by molecular  
17 methods, we explore the association of submicroscopic infection with a number of novel factors – these include  
18 age (at a finer resolution than has previously been possible), seasonality, geography and historical transmission  
19 patterns. Our findings highlight striking geographical variation in the size of the submicroscopic reservoir - this  
20 variation can be explained in-part by the historical patterns of transmission characterising each area, with the  
21 submicroscopic reservoir largest in areas with historically low levels of transmission. Integrating this information  
22 with estimates of the infectivity of submicroscopic and microscopically-detectable infections allows us to better  
23 define when and where submicroscopic malaria infections may be relevant to control efforts and highlights that  
24 the contribution of these low-density infections to transmission is likely to vary substantially across different  
25 settings.

26 **Implications of all the available evidence:** Our work highlights important and material differences in  
27 submicroscopic malaria epidemiology across settings and suggests the absence of a one-size-fits-all solution for  
28 malaria control efforts targeting this infected sub-group. Whether or not the submicroscopic reservoir requires  
29 targeting in the approach to elimination will depend on the particular setting, and likely warrant different  
30 approaches if the infection is to be controlled most effectively in the approach to elimination.

31

32

## 1 Introduction

2 Accurate detection of malaria infection during population surveys in endemic areas is a cornerstone  
3 of effective surveillance and control of the parasite. Routinely, this is undertaken using microscopy of  
4 blood films or rapid diagnostic tests, although recent years have seen increased usage of more  
5 sensitive molecular methods in research contexts. These techniques (typically PCR-based<sup>1</sup>) have  
6 revealed the widespread presence of infections with parasite densities lower than the threshold of  
7 detection by routine methods<sup>2-8</sup>.

8 Such “submicroscopic” infections are present across a range of different settings and populations<sup>5,9-</sup>  
9 <sup>11</sup>. Although rarely causative of severe symptoms, they have been associated with a number of adverse  
10 outcomes during pregnancy<sup>12,13</sup>, as well as mild anaemia<sup>14</sup> and other symptoms (vomiting, jaundice  
11 etc.) in children under 10<sup>15</sup>. In addition to their capacity to cause low-grade disease, these infections  
12 may hold public health relevance due to their contribution to onwards transmission: though typically  
13 characterised by lower parasite densities than microscopically detectable infections, individuals with  
14 submicroscopic infections frequently harbour gametocytes (the transmissible form of the parasite)  
15 and are capable of contributing to onwards transmission<sup>16,17</sup>. Submicroscopically infected individuals  
16 have been shown to contribute to transmission of the parasite across both areas of high<sup>18</sup> and low<sup>19</sup>  
17 transmission intensity, as well seasonal<sup>16</sup> and perennial<sup>17</sup> settings. Additionally, a recent meta-analysis  
18 revealed the detection limit of microscopy to be higher than is typically assumed and estimated that  
19 submicroscopic infections are on average only 3-fold less infectious to mosquitoes compared with  
20 microscopy-positive individuals<sup>20</sup>, further underscoring the potential relevance of this infected sub-  
21 group to malaria control efforts.

22 Despite this, our understanding of the factors influencing the size of the submicroscopic reservoir  
23 across endemic populations remains far from complete. Previous systematic reviews have found that  
24 microscopy misses on average, half of all *P. falciparum* infections compared to PCR-based methods in  
25 endemic country cross-sectional surveys<sup>21</sup> and that adults are more likely to harbour submicroscopic

1 infections than children<sup>22</sup>. However, whilst this relationship with age has previously been attributed  
2 to greater immunity in adults, paradoxically, in low transmission and near-elimination settings (where  
3 the extent of immunity might be expected to be minimal) the largest proportion of infections are  
4 submicroscopic<sup>23</sup>. Previous reviews lacked sufficient data in low and very low transmission areas to  
5 explore this paradox sufficiently and moreover, identified extensive unexplained variation in the size  
6 of the submicroscopically infected population across settings, suggesting the existence of other  
7 important factors that determine the size of the submicroscopic reservoir. For example, although the  
8 burden of submicroscopic infection is highly heterogeneous across different locations<sup>9,24</sup>, it remains  
9 unclear whether this represents systematic variation according to geography or is reflective of other  
10 underlying location-specific characteristics.

11 Resolving these gaps in our understanding of submicroscopic epidemiology has material  
12 consequences for the future of malaria control. Despite mixed reports surrounding more recent  
13 progress<sup>25</sup>, transmission is still declining in many endemic countries and the WHO has identified 21  
14 countries that have the potential to eliminate by 2020  
15 (<http://www.who.int/malaria/areas/elimination/e2020/en/>). Low transmission settings (such as  
16 those approaching elimination) frequently possess high proportions of submicroscopically infected  
17 individuals<sup>23,26</sup>. It remains unclear whether there is benefit in detecting and treating such cases, or  
18 whether resources are better spent elsewhere. Improving our understanding of the drivers of  
19 submicroscopic infection in these low transmission areas is therefore crucial to enable better  
20 definition of when and where submicroscopic infection is likely to occur and how the size of the  
21 submicroscopic reservoir is likely to change as areas approach elimination.

22 Here we update previous reviews on submicroscopic malaria infection prevalence<sup>21,23</sup>, leveraging the  
23 increase in the usage of molecular methods over the past 5 years to explore novel determinants of  
24 submicroscopic infection prevalence. These include geographical location and historical patterns of  
25 transmission, seasonality and the role of age at a finer resolution than previously possible. These

- 1 results are then integrated with literature-based estimates of the infectivity of submicroscopic
- 2 individuals to mosquitoes in order to estimate their contribution to malaria transmission across a
- 3 range of different settings.

## 1 **Methods**

### 2 **Systematic Review Update and Data Extraction**

3 Malaria prevalence data where both microscopy and PCR based methods had been used to determine  
4 infection were compiled, updating a previous review published in 2012<sup>23</sup>. Searches were carried out  
5 using PubMed and Web of Science and the search terms (“PCR” OR “Polymerase Chain Reaction”) AND  
6 “falciparum”. Records published January 2010 - July 2017 were searched, yielding 2136 records. A  
7 further two records, unpublished at the time of screening, were also included<sup>19,27</sup>, as were additional  
8 data collected through contacting authors of included references. Studies reporting asexual  
9 *P.falciparum* prevalence by microscopy and PCR in the same population were included. Surveys of  
10 pregnant women, where participants have been chosen on the basis of symptoms/treatment, or did  
11 not involve a population from a defined location were excluded. After screening titles and abstracts,  
12 231 references were retained for full text evaluation, of which 60 were included. This yielded 253 new  
13 prevalence survey pairs, and 387 total when including previous reviews (which previously identified  
14 45 relevant references)<sup>21,23</sup> (**Figure 1**).

15 Submicroscopic infections were defined as those where infection was detectable by PCR but not by  
16 microscopy. The specificity of microscopy compared to PCR has been shown to be high (average  
17 98.4%<sup>21</sup>); we therefore assume microscopy-positive individuals are also PCR-positive. In the small  
18 number of instances where the number of microscopically detected infections was higher than those  
19 identified by PCR (n = 9), the prevalence ratio was adjusted to 1– this adjustment does not qualitatively  
20 alter the results described here.

### 21 **Statistical Analysis and Bayesian Linear Regression**

22 As in previous reviews<sup>22</sup>, data were analysed using the regression-based methodology detailed in  
23 Sharp et al<sup>28</sup>:

$$24 \quad LM_i = PCR_i + \delta_i \quad (1)$$

$$\delta_i = \delta'_i + \beta_0(\text{PCR}_i - \overline{\text{PCR}}) \quad (2)$$

where  $\text{LM}_i$  = log odds of microscopy prevalence in survey  $i$ ,  $\text{PCR}_i$  = log odds of PCR prevalence,  $\overline{\text{PCR}}$  = mean survey PCR prevalence, and  $\delta_i$  = log odds ratio (OR) of microscopy to PCR prevalence. This formulation allows  $\delta_i$  to vary between surveys, with  $\beta_0$  controlling the extent of this variation. This model was fitted within a Bayesian Markov Chain Monte Carlo based framework, implemented in the statistical software package JAGS<sup>29</sup>.

### 7 Historical and Current Regional Transmission Intensity Stratification

Surveys conducted in African settings were geolocated and prevalence estimates (aggregated to the administrative unit 1 level) from the Malaria Atlas Project<sup>30</sup> used to characterise current and historical transmission intensity of the region each survey belonged to. We distinguish between local malaria transmission (defined by the prevalence recorded in each survey), and malaria transmission at the regional level (reflecting broader patterns of transmission). This regional-level transmission represents the average of a heterogeneous mixture of higher and lower transmission areas, and has relevance to local transmission because factors like human movement patterns and circulating parasite genetic diversity are often similar across nearby settings in the same region, even if transmission levels differ<sup>31,32</sup>. We stratified each study into one of three “transmission archetypes”:

- **Historically High, Currently High:** areas that have historically (defined as 15 years previous to the date of the survey) high transmission intensity (>15% slide prevalence in 2-10 year olds ( $PfPR_{2-10}$ )) and remain so at the time of the survey ( $n = 71$ ).
- **Historically High, Currently Low:** Areas of historically high transmission intensity that have declined in recent years to low levels (<15%  $PfPR_{2-10}$ ) ( $n = 65$ ).
- **Historically Low, Currently Low:** Areas characterised by historical and current low transmission (<15%  $PfPR_{2-10}$ ) ( $n = 28$ ).

Where MAP estimates were unavailable (for dates earlier than 2000), it was assumed that the year 2000 was reflective of historical transmission intensity given the only recent substantial increase in

1 international financing for malaria control (an approximately twentyfold increase between 2000 and  
2 2015)<sup>33</sup>.

### 3 **Calculating the Contribution of Submicroscopic Infections to Onwards Transmission**

4 Estimates of comparative infectivity of microscopically-detectable vs submicroscopic infections (the  
5 “infectivity ratio”) are variable, ranging from 2x<sup>34</sup> to a 20x difference<sup>35</sup>. We therefore explored three  
6 scenarios where microscopically detectable infections were either 2x, 5x or 20x more infectious to  
7 mosquitoes than submicroscopic infections. Proportional contribution to transmission by  
8 submicroscopic infections was calculated as:

$$9 \quad \frac{LM_{-ve}}{(LM_{+ve} * Infectivity Ratio) + LM_{-ve}}$$

10 The proportional contribution to transmission is the quantity of interest: the relative infectiousness of  
11 submicroscopic infections (the prevalence of which is denoted by  $LM_{-ve}$ ) is therefore set to 1, and  
12 *Infectivity Ratio* (2x, 5x or 20x) is a multiplicative factor reflecting the fact that microscopically  
13 detectable infections (prevalence denoted by  $LM_{+ve}$ ) are more infectious. The equation’s  
14 denominator reflects total onwards transmission occurring within the population; the numerator the  
15 amount of transmission attributable to submicroscopic infections. These analyses assume that that  
16 submicroscopic and microscopically infected populations do not differ in other key factors likely to  
17 also influence transmission (e.g. age and mosquito exposure).

18



## 1 Results

2 Across the 267 surveys included in our analyses that assessed infection status across a range of ages,  
3 microscopy detected on average 46.5% of all PCR-detectable infections (43.0% - 50.0%, 95% CI),  
4 although this varied (**Fig.2A**). There was no difference in the observed relationship between PCR and  
5 microscopy prevalence when the model was fitted separately to data collated in previous reviews and  
6 the data newly extracted here (**Supp Fig.1**). The prevalence ratio (defined as the proportion of PCR  
7 positive infections detected by microscopy) increased as malaria transmission increased, indicating a  
8 declining proportion of submicroscopically infected individuals, from between 70-80% in the areas of  
9 lowest PCR prevalence to only 10-20% in the highest prevalence areas (**Fig.2B**). A number of more  
10 flexible model structures were also fitted to the data, although the log-linear model provided the best  
11 overall fit (**Supp Fig.3**). Large variation still remained in the proportion of submicroscopic infections  
12 between surveys carried out in regions with similar PCR prevalence (**Fig.2C**), pointing to additional  
13 factors beyond current transmission intensity in shaping the size of the submicroscopic reservoir.  
14 There was no statistically significant effect of sampling season after controlling for survey PCR  
15 prevalence (ANOVA,  $p = 0.181$ ,  $df = 2$ , **Fig.3**), but a statistically significant effect of PCR methodology  
16 (ANOVA,  $df = 5$ ,  $p < 0.001$ , **Supp Fig.4**). Scanning a higher number of microscopy fields to determine  
17 infection presence/absence was also significantly associated with the prevalence ratio increasing  
18 (ANOVA,  $df = 1$ ,  $p < 0.01$ ).

19 We defined 3 age-based categories: infants (0-5 years old), older children (5-15 years old) and adults  
20 (>15 years old), yielding 40, 37 and 43 prevalence survey pairs. The prevalence ratio varied significantly  
21 between age groups (ANOVA,  $p < 0.001$ ,  $df = 2$ ), and was significantly lower in adults (indicating a  
22 greater proportion of submicroscopic infections) compared to young children (Tukey's HSD,  $p < 0.001$ )  
23 and older children (Tukey's HSD,  $p < 0.001$ ). A similar disparity was observed between older and  
24 younger children, although this difference was not significant (Tukey's HSD,  $p = 0.61$ ). We also  
25 explored whether these differences were observed consistently across the range of transmission

1 settings (using survey PCR prevalence as a proxy for transmission intensity) present in the data (**Fig.4**).  
2 Fitting the log-linear regression model separately to the data for each age group highlighted that the  
3 increased prevalence ratio observed in infants and older children compared to adults was less  
4 pronounced in higher transmission settings. For example, in high endemic areas with 70% overall PCR  
5 prevalence, the prevalence ratio for infants was predicted to be 1.42x that of adults, but 1.92x at low  
6 endemic areas with 10% overall PCR prevalence. A similar result was observed for adults and older  
7 children, suggesting genuine differences in submicroscopic epidemiology both between age groups  
8 and across transmission settings.

9 Grouping surveys by global region (West Africa, East Africa, South America, and Asia/Oceania)  
10 revealed significant geographical variation in the prevalence ratio (ANOVA,  $p < 0.001$ ,  $df = 3$ ), being  
11 lower in South American surveys compared to other regions (Tukey's HSD,  $p < 0.001$  for all 3 pairwise  
12 comparisons), even after controlling for survey PCR prevalence through regression based modelling  
13 (**Fig.5**). There was no evidence that these differences were due to PCR and microscopy methodologies  
14 used in different global regions, with no substantial variation in the methodology used between  
15 regions indicating that the low prevalence ratio in South America (indicating a wider disparity in PCR  
16 and microscopy performance) was likely not occurring due to systematic differences in assay  
17 sensitivities between settings (**Supp Fig.5**).

18 The majority of the South American surveys had been undertaken in areas marked by historically low  
19 transmission. We therefore investigated whether a high proportion of submicroscopic infections (low  
20 prevalence ratio) might be observed in areas around the world that had experienced similar  
21 historically low patterns of transmission. Each survey carried out in Africa (a continent for which  
22 estimates of malaria prevalence are available at a high spatio-temporal resolution) was therefore  
23 geolocated and the estimates of Historical and Current Regional Prevalence at the administrative unit  
24 1 level collated to disentangle the effects of historical prevalence from more contemporary  
25 transmission.

1 Results indicated that Regional Historical Prevalence, but not Regional Current Prevalence was a  
2 significant predictor of the prevalence ratio when controlling for Survey Prevalence (ANOVA,  $p < 0.001$   
3 for both Survey Prevalence and Regional Historical Prevalence,  $p = 0.73$  for Regional Current  
4 Prevalence), suggesting that historical patterns of transmission are an important determinant of the  
5 submicroscopic reservoir size. To further explore this, we classified each survey in our review from  
6 Africa into 3 transmission “archetypes” based on historical and current regional levels of transmission  
7 and fitted regression models to each. The results from these models were concordant with the results  
8 from the ANOVA, with African surveys in regions with both historically and currently low transmission  
9 (Sudan, Ethiopia and parts of Kenya and Tanzania) having on average, a lower prevalence ratio (more  
10 submicroscopic infections) compared to other low-endemic areas in Africa where historical  
11 transmission has been high (**Fig.6**). There was no evidence of systematic differences in the PCR and  
12 microscopy methodologies in different transmission archetypes (**Supp Fig.6**) and the observed results  
13 were robust to the choice of High/Low threshold (**Supp Fig.7**).

14 Integrating these results with estimates of comparative submicroscopic infectivity to mosquitoes, we  
15 estimate that in transmission settings characterised by historically low levels of transmission,  
16 submicroscopically infected individuals could account for 17.5% to 68.0% of onwards transmission in  
17 low prevalence settings (defined as  $\leq 5\%$  survey prevalence by PCR), depending on the assumption  
18 surrounding the comparative infectivity of microscopically detectable and submicroscopic infections  
19 (**Fig.7C**). By contrast, our results suggest the contribution of the submicroscopic reservoir to  
20 transmission is less important in settings where transmission has only recently declined (**Fig.7B**)  
21 although their contribution is not irrelevant, ranging from 7.8% to 46.0% depending on the assumed  
22 comparative infectivity.

1

2

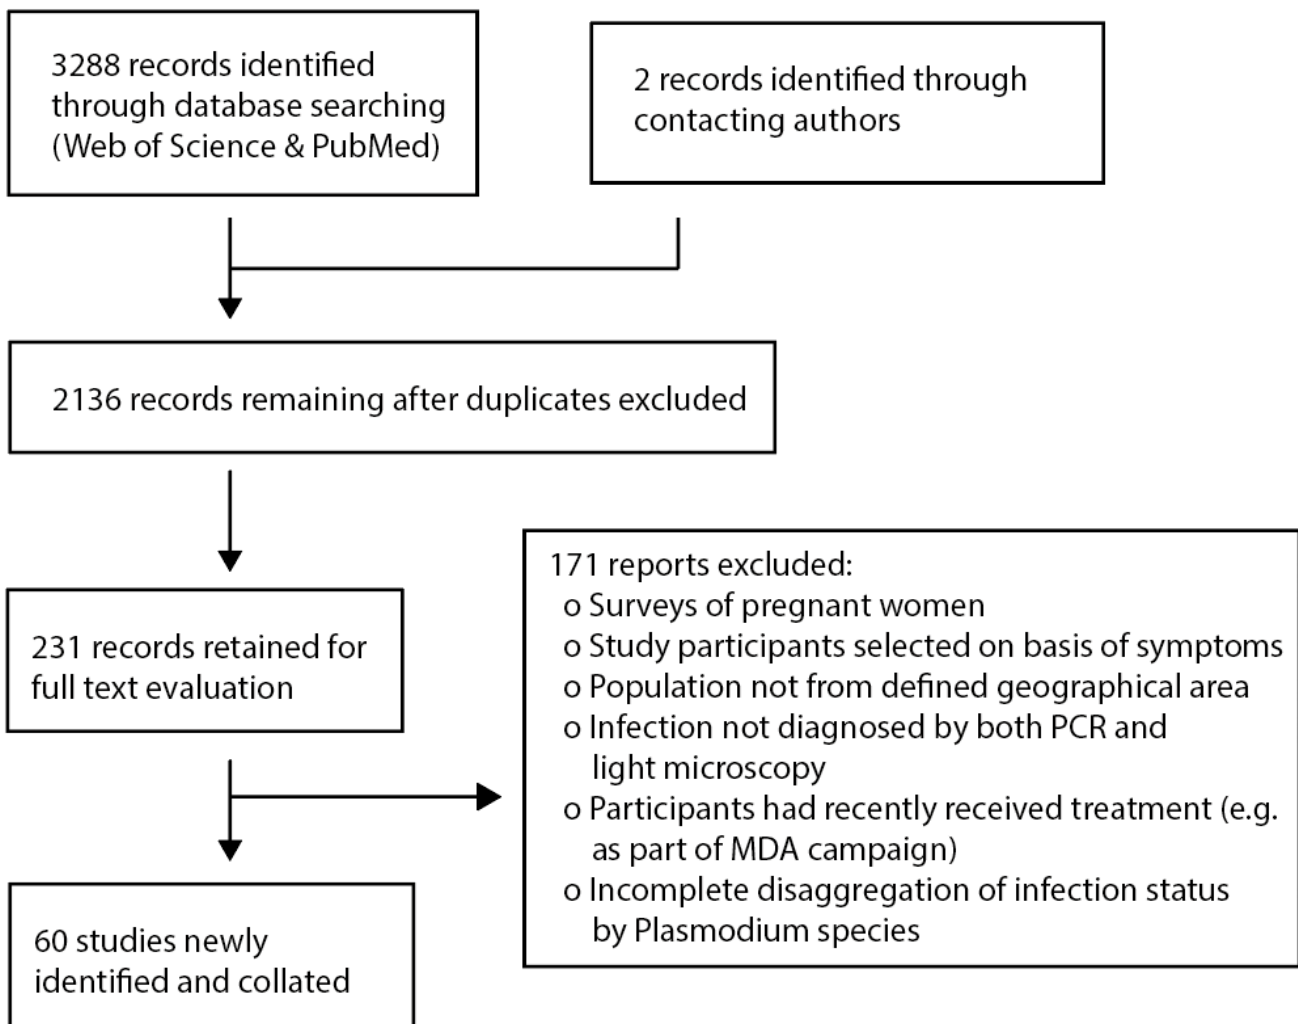

3

4

5

6

7

8

**Figure 1: Systematic review overview, workflow and selection of eligible studies.** Searches for malaria prevalence data where infection status had been determined using both microscopy and PCR based methods. 51 studies were included in the formal analyses, including two references unpublished at the time of screening and a limited amount of additional data collected through contacting study authors.

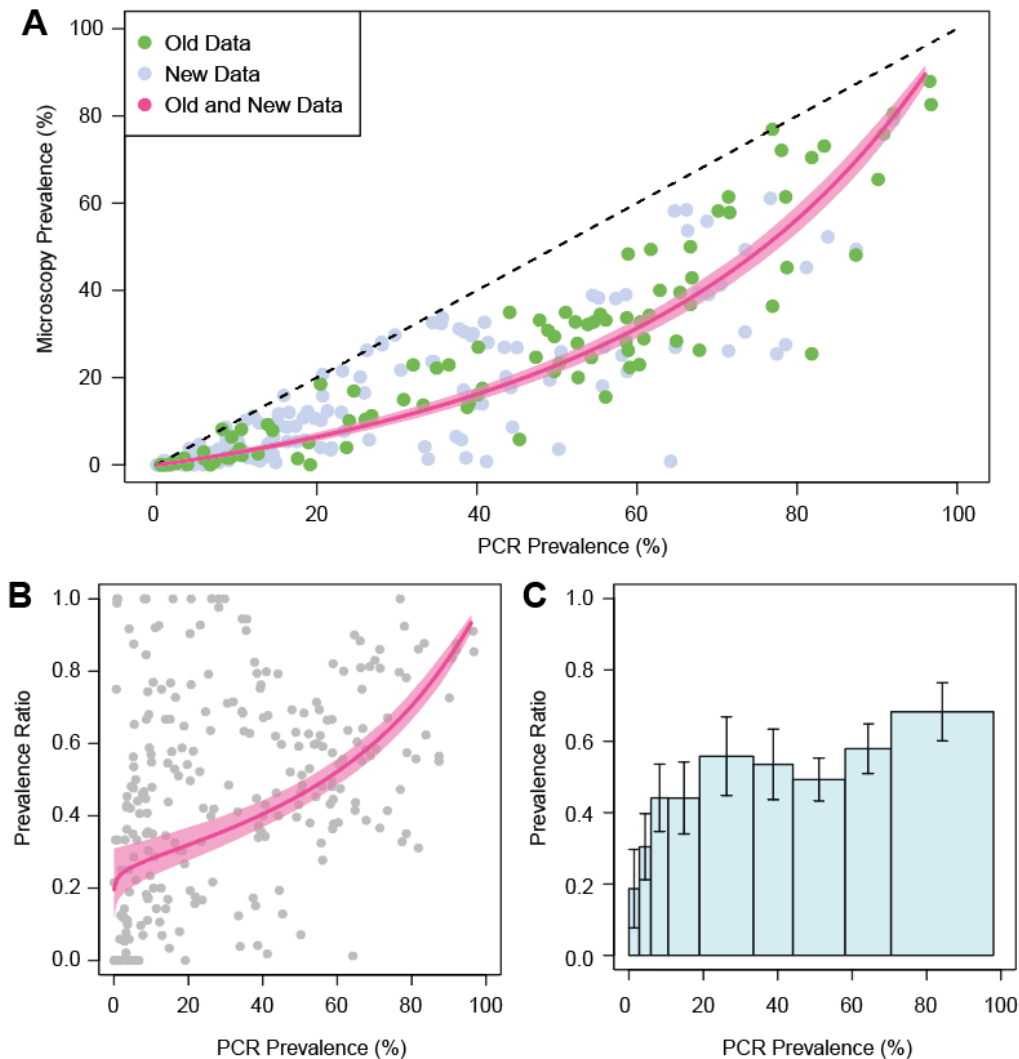

1

2 **Figure 2: Prevalence of infection by PCR versus microscopy in 282 prevalence survey pairs and model fits.**

3 Bayesian Markov chain Monte Carlo methods were used to fit a linear relationship between PCR prevalence and  
4 microscopy prevalence on the log odds scale. **(A)** Microscopy and PCR prevalence ( $n = 267$ ) in surveys identified in  
5 this updated systematic review (light purple points,  $n = 170$ ) and in previous reviews (green points,  $n = 97$ ), with  
6 the fitted model relationship (pink line) and the 95% credible interval of the mean (pale pink shaded area). **(B)** The  
7 prevalence ratio (the proportion of PCR positive individuals also detectable by microscopy) according to underlying  
8 PCR prevalence for each of the 282 survey microscopy-PCR pairs (grey points) used to fit the full model. The  
9 estimated average prevalence ratio (pink line) and 95% credible interval of the mean (pale pink shaded area) also  
10 shown **(C)** Empirically estimated microscopy sensitivity. Survey pairs were categorised into 9 categories of equal size  
11 and mean microscopy sensitivity empirically estimated for each category. Error bars represent the binomial 95%  
12 confidence interval.

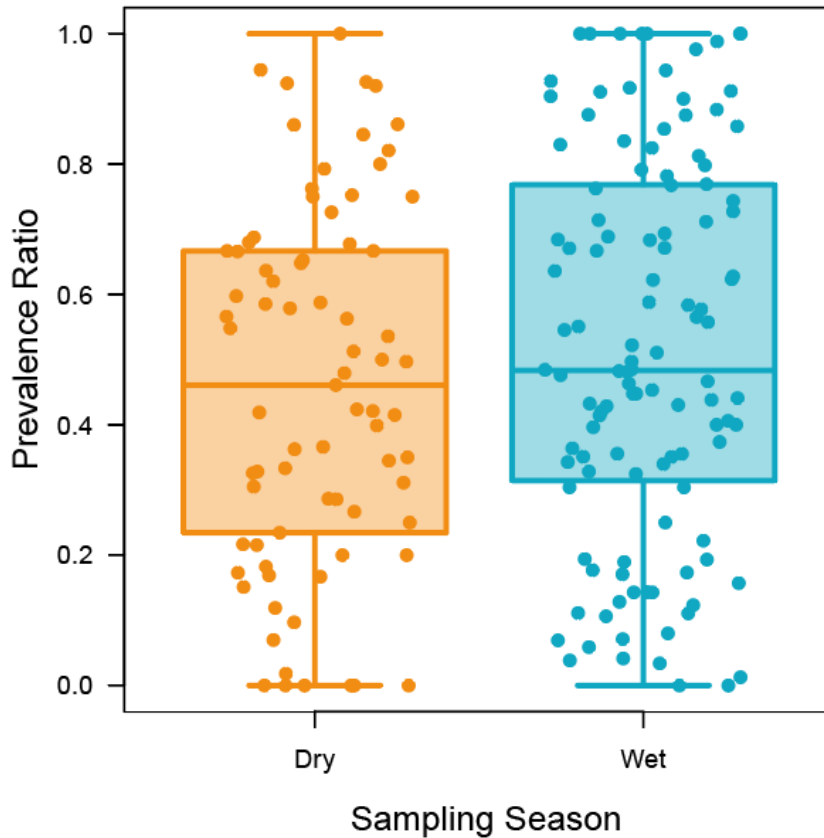

**Figure 3: Comparing the prevalence ratio across different sampling seasons.** Where available, information from references on the seasonal timing of the sampling was extracted and collated. Presented are boxplots of the prevalence ratio (defined as the ratio of microscopically detectable infections and PCR detectable infections, with a lower prevalence ratio indicating a higher proportion of individuals with submicroscopic infections) stratified by sampling season ( $n = 77$  for dry season sampling, and  $n = 116$  for wet season sampling), including also the raw datapoints (coloured circles).

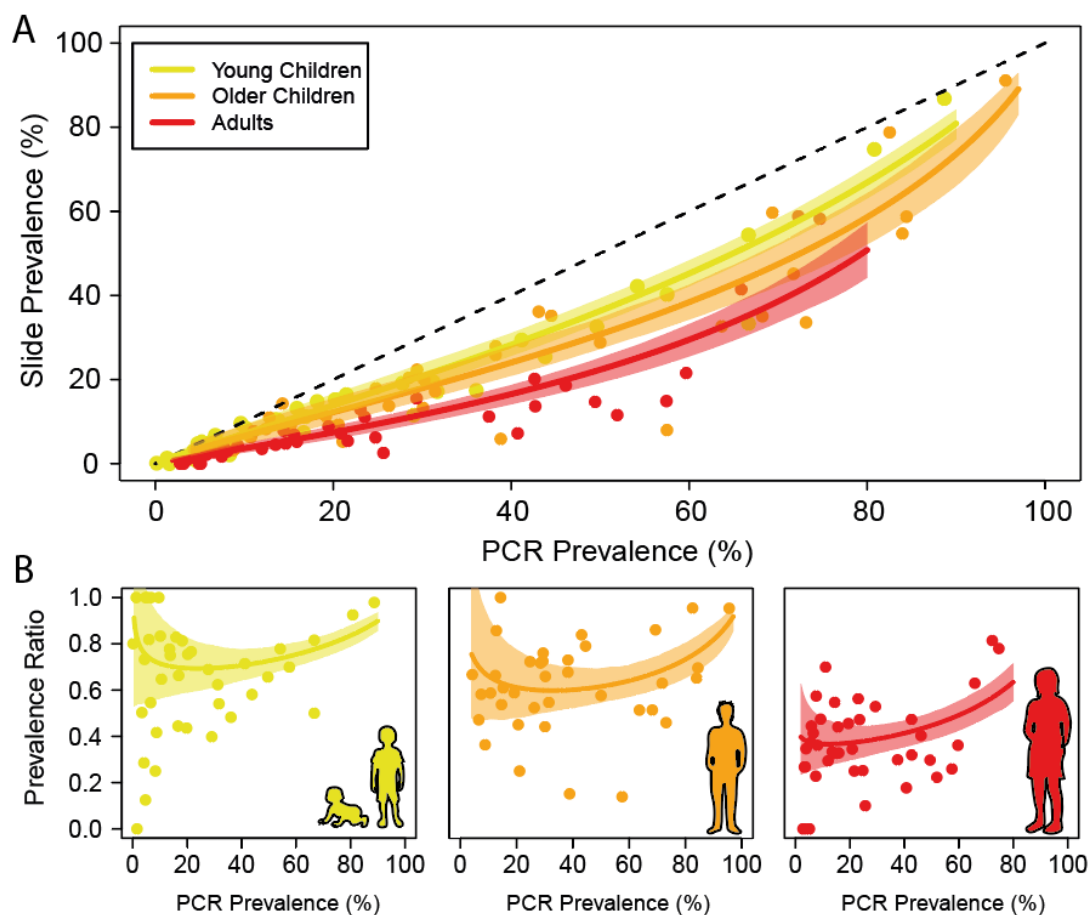

**Figure 4: The influence of age on submicroscopic parasite carriage.** Separate models were fitted where age disaggregated data were available to assess whether the prevalence of infection by microscopy compared to PCR varied with age. **(A)** Age disaggregated prevalence survey data for young children (0-5 years old, yellow points,  $n = 40$ ) older children (5-15 years old, orange points,  $n = 37$ ) and adults (red points,  $n = 43$ ) with the fitted model relationship (coloured line) and 95% credible interval for each (shaded area). **(B)** The prevalence of microscopy compared to PCR (the prevalence ratio) in surveys where age-disaggregated data (dots) were available by age group, showing the fitted model relationship (coloured lines) and the 95% credible interval (shaded areas).

1

2

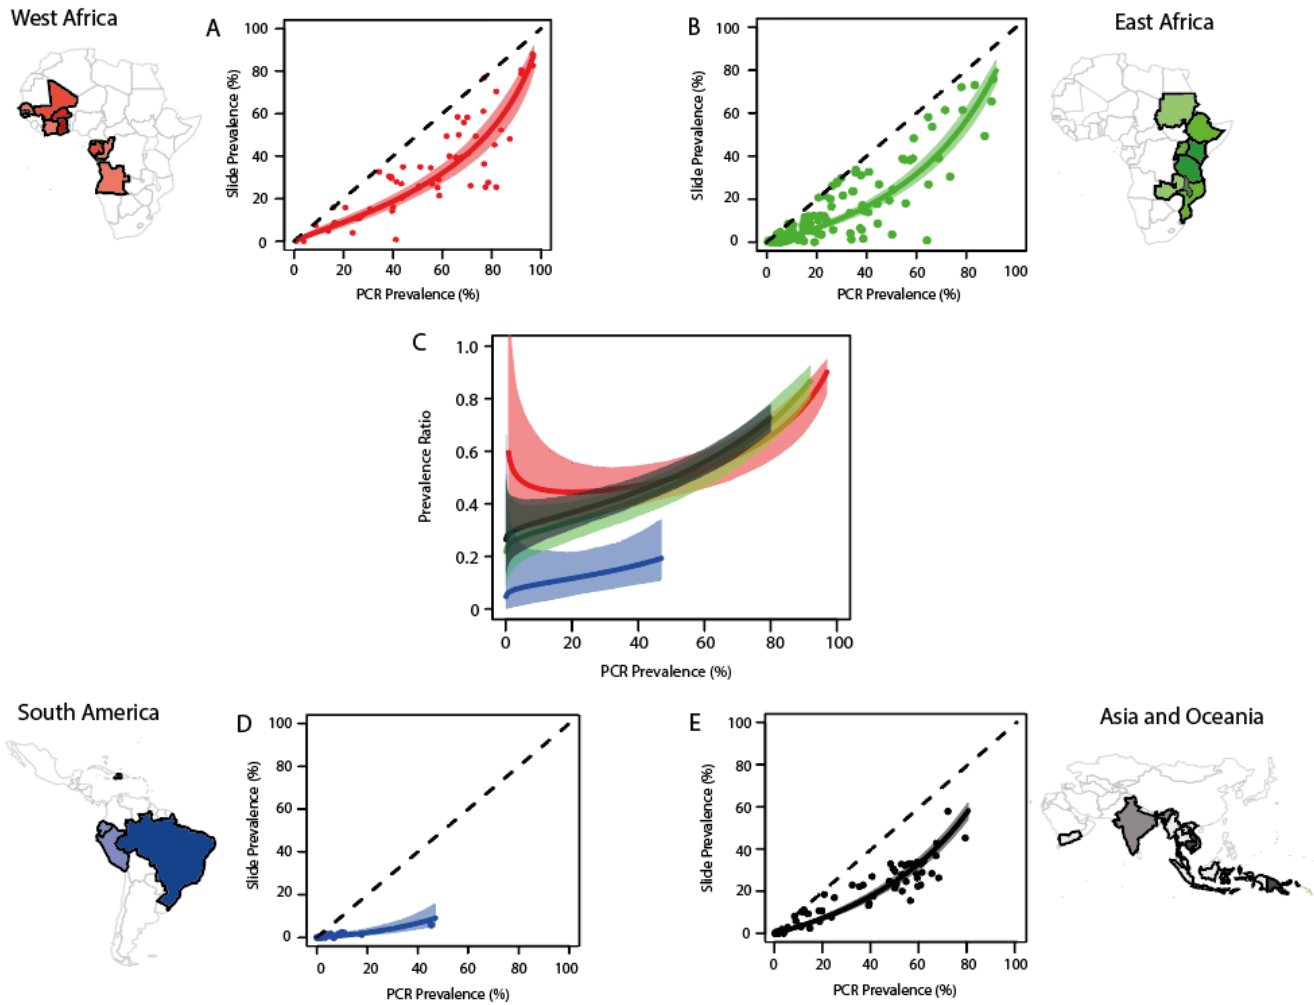

3

4

5

6

7

8

9

10

11

**Figure 5: Global variation in the prevalence ratio and the relative size of the submicroscopic reservoir.** Microscopy and PCR prevalence in included surveys (points), the model-fitted relationship (coloured line) and 95% credible interval (shaded area) for **(A)** West Africa ( $n = 56$ ), **(B)** East Africa ( $n = 120$ ), **(D)** South America ( $n = 23$ ) and **(E)** Asia and Oceania ( $n = 66$ ). **(C)** The model-fitted average microscopy: PCR prevalence ratio by PCR prevalence for each of the 4 regions (coloured) line and 95% credible interval (shaded area). Intensity of colour for each country on each regional map indicates the comparative number of studies for each country, compared to other countries in that same region.



1

2

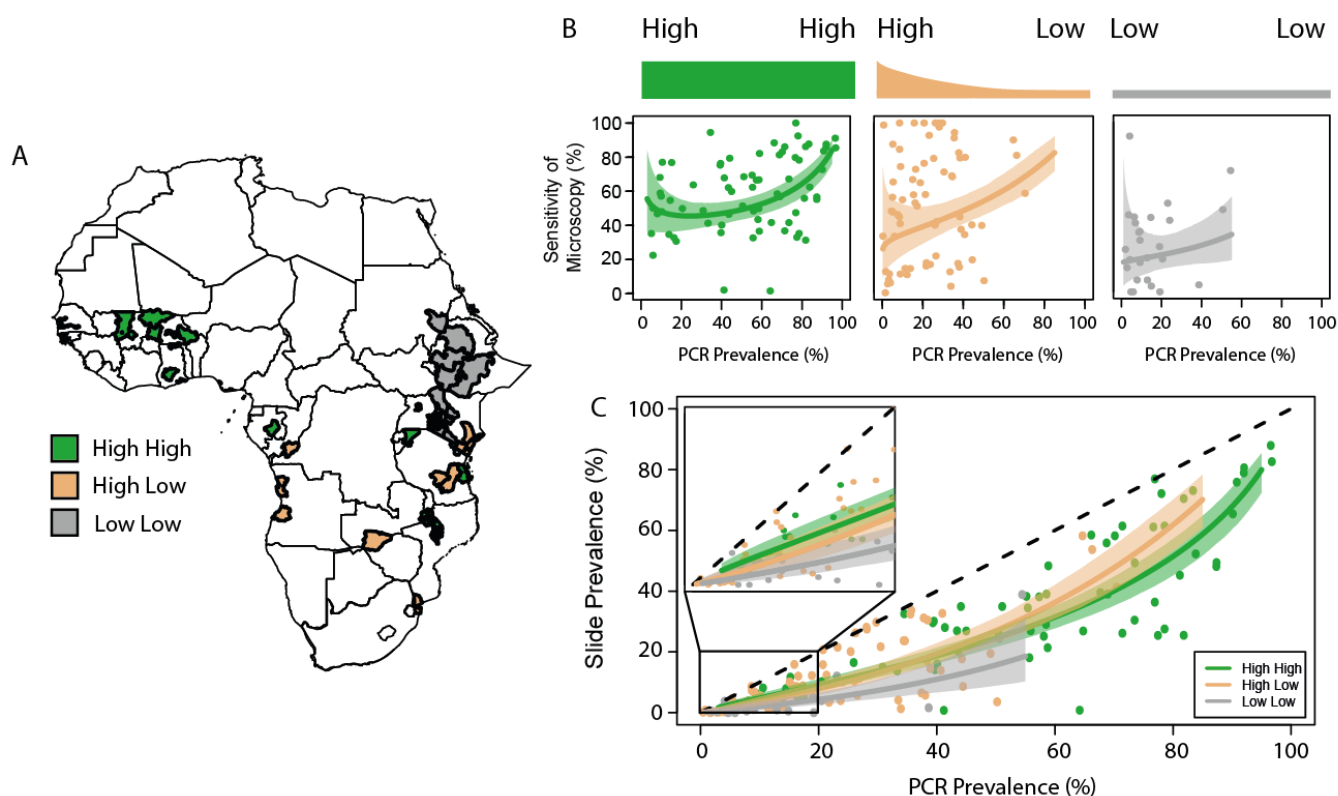

3

4 **Figure 6: The effect of historical and current transmission intensity on the prevalence of submicroscopic infection**

5 **in Africa.** Historical estimates of malaria prevalence<sup>36</sup> were used to assign surveys in Africa to one of three

6 transmission intensity archetypes, and then separate models fitted to each to explore whether variation in the

7 present and historical levels of transmission in a region might influence the frequency of submicroscopic infection

8 in endemic populations. **(A)** Map detailing the African countries for which prevalence surveys were identified, as

9 well as their assigned transmission archetypes based on historical and current transmission intensity (high high=

10 historically high and currently high; high low = historically high, currently low; low low = historically low and

11 currently low) . **(B)** The microscopy: PCR prevalence ratio of surveys in each transmission archetype (dots, n = 72,

12 71 and 26 for high high, high low and low low, respectively), and the modelled average prevalence ratio (coloured

13 line) with 95% credible interval (shaded area). **(C)** The model fitted relationship (coloured lines) and 95% credible

14 interval (shaded areas) for each of the transmission archetypes, with a particular focus on low prevalence (<20%)

15 settings (inset box).

1  
2  
3  
4

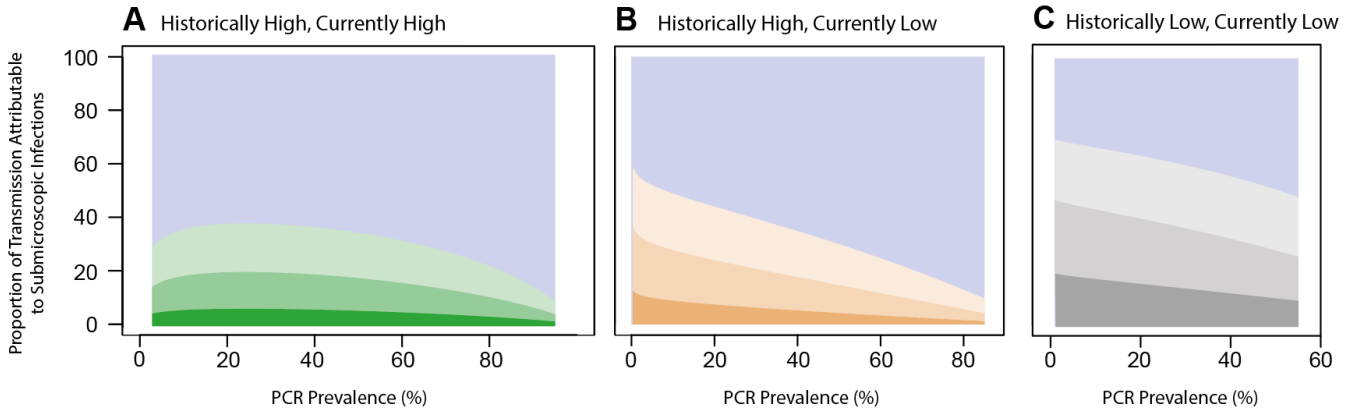

5

6 **Figure 7: The potential contribution of submicroscopic infections to onwards transmission according to current**  
7 **and historical transmission intensity.** Using our modelled relationship between PCR and microscopy prevalence  
8 (Figure 5), we estimated the potential contribution of the submicroscopic reservoir to onwards transmission for  
9 each of the transmission archetypes (A high high; B high low; C low low) if microscopic infections are either 2x, 5x  
10 or 20x more infectious than submicroscopic infections. In each panel, the purple shaded area represents the  
11 proportion of transmission attributable to microscopically detectable infections, and the lower shaded areas the  
12 contribution of submicroscopic infections for each of the 3 assumed comparative infectivities- darkest shade is 20x  
13 (i.e. that microscopically detectable infections are 20x more infectious than submicroscopic infections),  
14 intermediate shade is 5x, and lightest shade is 2x.

15

## 1 Discussion

2 Significant debate surrounds the importance of the submicroscopic reservoir to malaria control  
3 efforts, particularly whether such infections need to be targeted by interventions<sup>37</sup> and particularly in  
4 areas of low transmission. Disaggregating the now larger quantity of available data (282 prevalence  
5 survey pairs from 38 countries) has yielded insight into the complex relationships underlying the global  
6 pattern of submicroscopic occurrence, facilitating a more refined evaluation of when and where  
7 submicroscopic infections are likely to be most prevalent and who is most likely to harbour them. In  
8 particular, we show that the transmission gradient in the proportion of submicroscopic infections  
9 observed across all settings can be explained by differences in the historical patterns of transmission  
10 and the age structure of the infected population. Moreover, whilst previous work has generally noted  
11 the potential relevance of submicroscopic infections in low transmission settings<sup>38</sup>, our results suggest  
12 that this relevance is likely to be highly context dependent, potentially warranting different  
13 approaches to their control depending on the setting.

14 Malaria prevalence across different settings varies with age<sup>39</sup>, a feature attributed to the development  
15 of immunity after exposure, as well as age-related effects apparently independent of exposure<sup>40,41</sup>. As  
16 a result, increasing age and increased immunity have been associated with lower parasite densities<sup>40,42</sup>  
17 and our analyses confirmed a higher proportion of submicroscopically infected individuals in surveys  
18 of adults compared with children. We also found systematically larger proportions of submicroscopic  
19 infections in regions with a history of low overall malaria prevalence, a result that was observed across  
20 both South America and in regions of Africa such as Ethiopia, Sudan and parts of Kenya and Tanzania.

21 An important caveat to these findings is that there were insufficient data to examine the role of age  
22 and transmission history simultaneously. The average age of infection is typically higher in low  
23 transmission settings<sup>39,43</sup>; therefore, a greater proportion of infected individuals in all-age surveys will  
24 be adults. Our results surrounding past transmission history might then be confounded by differences  
25 in the average age of infection across these different settings. However, the age distribution of malaria

1 infection appears to adapt fairly rapidly to reflect changes in transmission: in an area of south-western  
2 Senegal experiencing a 30-fold reduction in malaria incidence between 1996 and 2010, there was a  
3 shift in the age distribution of cases from predominantly under-5s to a distribution that was near  
4 uniform across the population<sup>44</sup>. Similarly, rapid declines in malaria between 2003 and 2007 in The  
5 Gambia were shown to be accompanied by an increase in the mean age of paediatric malaria  
6 admissions from 3.9 years to 5.6 years<sup>45</sup>. These clinical results also extend to the prevalence of malaria  
7 infection (as assessed by microscopy) in wider populations and communities<sup>43</sup>. These observations  
8 suggest that the difference in infected population age structure between surveys from historically and  
9 currently low settings and those from settings where transmission has only recently declined may not  
10 be large. Therefore this confounding is unlikely to explain our finding of a lower proportion of  
11 submicroscopic infections in areas of current low transmission but where transmission has historically  
12 been high (compared to those where transmission with historically and currently low transmission).

13 Another potential limitation is the strong geographical bias in our transmission archetype  
14 stratification. The majority of surveys assigned to the “Low Low” archetype are from East Africa, whilst  
15 the majority of surveys in the “High High” category are from West Africa. The observed results across  
16 transmission archetypes could therefore in theory be reflecting geographical variation, rather than  
17 variation driven by past transmission history. Two strands of analysis refute this: firstly, that analysis  
18 of the submicroscopic reservoir across global regions revealed minimal difference in the prevalence  
19 ratio across West and East Africa. And secondly, that the proportion of infections which are  
20 submicroscopic in “High Low” settings (a strata also predominantly composed of studies from East  
21 Africa) was consistently lower than that observed for “Low Low” settings. These observed differences,  
22 together with the results observed for South America therefore support an effect of transmission  
23 history on the submicroscopic reservoir which is distinct from the age structure of the infected  
24 population and unlikely to be driven by geographical bias.

1 A number of hypotheses could explain these results, including systematic variation in asexual blood  
2 stage multiplication rate of *Plasmodium falciparum*<sup>46</sup> or various haemoglobinopathies and human  
3 genetic traits that have been linked to lower average parasite densities<sup>41,47</sup>. It is also not possible to  
4 definitively preclude systematic variation in diagnostic quality across settings, although this is perhaps  
5 unlikely: for example, a recent analysis found that whilst microscopy quality varies across settings, it  
6 does not do so systematically with transmission intensity<sup>48</sup>. Whilst our results highlight that PCR  
7 methodology does significantly influence the prevalence ratio (**Supp Fig.7**), systematic variation in  
8 methodological quality across geographical (**Supp Fig.5**) and transmission archetypes (**Supp Fig.6**)  
9 settings was not observed. Interestingly, our analyses revealed no influence of seasonal effects on  
10 submicroscopic carriage, despite parasite densities having been shown to slightly rise during the rainy  
11 season even when prevalence does not change significantly (possibly due to increased occurrence of  
12 superinfection during these periods)<sup>48,49</sup>. This is consistent with other recent results which similarly  
13 found no difference in the submicroscopic reservoir between seasons, when directly comparing the  
14 wet and dry season submicroscopic prevalence across the same locations<sup>20</sup>.

15 Variation in the extent of parasite genetic diversity between settings could also explain the observed  
16 results. Differences in the breadth and rate of immunity acquisition in settings where transmission  
17 remains high (where standing genetic diversity is typically high and individuals are exposed to a  
18 diversity of antigenically distinct parasites not previously encountered) and where transmission has  
19 historically been low (where the limited diversity of circulating strains might enable more rapid and  
20 effective development of protective immunity) could generate the patterns of submicroscopic  
21 carriage observed across different transmission archetypes. This hypothesis might go some way to  
22 explain recent results within countries that are discordant with the global pattern: recent  
23 characterisation of submicroscopic malaria carriage at three Ugandan sites with varied transmission  
24 intensity revealed little change in the extent and size of the submicroscopic reservoir across the  
25 transmission gradient at this sub-national level<sup>10</sup>. Furthermore, a micro-epidemiological survey in  
26 north-west Tanzania found the odds of an infection being submicroscopic actually increased with

1 household exposure<sup>50</sup>. Under an assumption of spatial circulation of strains between subnational  
2 localities (which can result in high parasite diversities even in areas of low transmission<sup>51</sup>), mixing of  
3 parasites between sites of varying transmission intensity but spatial proximity would result in similar  
4 extents of parasite genetic diversity<sup>52</sup>, and by extension, submicroscopic burdens. This would be  
5 despite marked differences in levels of local transmission.

6 Our work suggests that the contribution of submicroscopic infections to onwards transmission is likely  
7 highly variable across settings; however, this analysis is based on the detection of asexual parasites  
8 and does not provide direct insight into gametocyte densities. The relationship between asexual  
9 parasite and gametocyte density is highly non-linear<sup>42</sup> and the distributions of parasite densities in the  
10 submicroscopic range can differ substantially between settings<sup>48</sup>. Therefore the proportion of  
11 submicroscopic infections may not relate linearly to their contribution to onwards transmission. For  
12 example, whilst a recent membrane feeding study conducted in Burkina Faso and Kenya (high  
13 transmission settings) found that 45-75% of all mosquito infections were derived from submicroscopic  
14 infections<sup>27</sup>, only 4% of infections arose from submicroscopic individuals in a similar study carried out  
15 in Cambodia (a low transmission setting)<sup>35</sup>. These findings contrast with the predictions presented  
16 here and underscore the need to better resolve the relationship between submicroscopic parasite  
17 carriage, gametocyte densities, and mosquito infectivity.

18 Although progress has stalled recently, substantial enthusiasm still surrounds attempts to eliminate  
19 malaria<sup>53</sup>. Despite this however, and despite their potential relevance, our understanding of  
20 submicroscopic infections remains far from complete. Do they represent a substantial source of  
21 transmission and threat to future progress? Or do they simply reflect the remnants of infections,  
22 capable of minimal transmission and thus less of a concern? Our work highlights important differences  
23 in submicroscopic epidemiology between settings and suggests the absence of a one-size-fits-all  
24 solution for malaria control targeting this infected subgroup. Such variation will likely warrant

1 different approaches to malaria control if the infection is to be controlled most effectively in the  
2 approach to elimination.

3 **Contributors:** LO and CD conceived the idea of the study. CW, LO and HS contributed to the design of  
4 the study. CW carried out the systematic review and the subsequent analyses, in consultation with LO  
5 and HS. LO, HS, TB, CD and AG all provided feedback and suggestions during manuscript drafting. CW  
6 and LO wrote the manuscript. All authors approved the final version of the manuscript.

7 **Declaration of interests:** We declare no competing interests

8 **Acknowledgements:** We thank Jenny Walldorf, Miriam Laufer, Andrea Buchwald, Lauren Cohee, Terri  
9 Taylor and Don Mathanga for kindly providing access to additional data from their original work.

10 **Code and Software:** Complete details of the code used to analyse the collated data can be found at  
11 [https://github.com/cwhittaker1000/Sub\\_Patent\\_Malaria\\_Analysis](https://github.com/cwhittaker1000/Sub_Patent_Malaria_Analysis)

12

## References

1. Snounou, G. *et al.* The importance of sensitive detection of malaria parasites in the human and insect hosts in epidemiological studies, as shown by the analysis of field samples from Guinea Bissau. *Trans. R. Soc. Trop. Med. Hyg.* **87**, 649–53
2. Lamptey, H. *et al.* The prevalence of submicroscopic Plasmodium falciparum gametocyte carriage and multiplicity of infection in children, pregnant women and adults in a low malaria transmission area in Southern Ghana. *Malar. J.* **17**, 331 (2018).
3. Zhou, Z. *et al.* Assessment of submicroscopic infections and gametocyte carriage of Plasmodium falciparum during peak malaria transmission season in a community-based cross-sectional survey in western Kenya, 2012. *Malar. J.* **15**, (2016).
4. Shekalaghe, S. A. *et al.* Submicroscopic Plasmodium falciparum gametocyte carriage is common in an area of low and seasonal transmission in Tanzania. *Trop. Med. Int. Heal.* **12**, 547–553 (2007).
5. Steenkeste, N. *et al.* Sub-microscopic malaria cases and mixed malaria infection in a remote area of high malaria endemicity in Rattanakiri province, Cambodia: implication for malaria elimination. *Malar. J.* **9**, 108 (2010).
6. Baum, E. *et al.* Common asymptomatic and submicroscopic malaria infections in Western Thailand revealed in longitudinal molecular and serological studies: a challenge to malaria elimination. *Malar. J.* **15**, 333 (2016).
7. Arango, E. M. *et al.* Molecular Detection of Malaria at Delivery Reveals a High Frequency of Submicroscopic Infections and Associated Placental Damage in Pregnant Women from Northwest Colombia. *Am. J. Trop. Med. Hyg.* **89**, 178–183 (2013).
8. Mueller, I. *et al.* High sensitivity detection of Plasmodium species reveals positive correlations between infections of different species, shifts in age distribution and reduced local variation in Papua New Guinea. *Malar. J.* **8**, 41 (2009).
9. Tadesse, F. G. *et al.* The shape of the iceberg: quantification of submicroscopic Plasmodium falciparum and Plasmodium vivax parasitaemia and gametocytaemia in five low endemic settings in Ethiopia. *Malar. J.* **16**, 99 (2017).
10. Rek, J. *et al.* Characterizing microscopic and submicroscopic malaria parasitaemia at three sites with varied transmission intensity in Uganda. *Malar. J.* **15**, 470 (2016).
11. Carmona-Fonseca, J. *et al.* Molecular Detection of Malaria at Delivery Reveals a High Frequency of Submicroscopic Infections and Associated Placental Damage in Pregnant Women from Northwest Colombia. *Am. J. Trop. Med. Hyg.* **89**, 178–183 (2013).
12. Cottrell, G. *et al.* Submicroscopic Plasmodium falciparum Infections Are Associated With Maternal Anemia, Premature Births, and Low Birth Weight. *Clin. Infect. Dis.* **60**, 1481–1488 (2015).
13. Omer, S. A. *et al.* Impact of Submicroscopic Plasmodium falciparum Parasitaemia on Maternal Anaemia and Low Birth Weight in Blue Nile State, Sudan. *J. Trop. Med.* **2019**, 1–7 (2019).
14. Ladeia-Andrade, S., Ferreira, M. U., de Carvalho, M. E., Curado, I. & Coura, J. R. Age-dependent acquisition of protective immunity to malaria in riverine populations of the Amazon Basin of Brazil. *Am. J. Trop. Med. Hyg.* **80**, 452–9 (2009).
15. Katrak, S. *et al.* Clinical consequences of submicroscopic malaria parasitaemia in Uganda. *Malar. J.* **17**, 67 (2018).
16. Ouédraogo, A. L. *et al.* Substantial Contribution of Submicroscopical Plasmodium falciparum Gametocyte Carriage to the Infectious Reservoir in an Area of Seasonal Transmission. *PLoS One* **4**, e8410 (2009).
17. Schneider, P. *et al.* Submicroscopic Plasmodium falciparum gametocyte densities frequently result in mosquito infection. *Am. J. Trop. Med. Hyg.* **76**, 470–4 (2007).
18. Ouédraogo, A. L. *et al.* Dynamics of the Human Infectious Reservoir for Malaria Determined by Mosquito Feeding Assays and Ultrasensitive Malaria Diagnosis in Burkina Faso. *J. Infect. Dis.* **213**, 90–99 (2016).
19. Tadesse, F. G. *et al.* The Relative Contribution of Symptomatic and Asymptomatic Plasmodium vivax and Plasmodium falciparum Infections to the Infectious Reservoir in a Low-Endemic Setting in Ethiopia. *Clin. Infect. Dis.* (2018). doi:10.1093/cid/cix1123
20. Slater, H. C. *et al.* The temporal dynamics and infectiousness of subpatent Plasmodium falciparum infections in relation to parasite density. *Nat. Commun.* **10**, 1433 (2019).
21. Okell, L. C., Ghani, A. C., Lyons, E. & Drakeley, C. J. Submicroscopic Infection in Plasmodium falciparum –Endemic Populations: A Systematic Review and Meta-Analysis. *J. Infect. Dis.* **200**, 1509–1517 (2009).
22. Okell, L. C. *et al.* Factors determining the occurrence of submicroscopic malaria infections and their relevance for control. *Nat. Commun.* **3**, (2012).
23. Okell, L. C. *et al.* Factors determining the occurrence of submicroscopic malaria infections and their relevance for control. *Nat. Commun.* **3**, 1237 (2012).
24. Idris, Z. M. *et al.* High and Heterogeneous Prevalence of Asymptomatic and Sub-microscopic Malaria Infections on Islands in Lake Victoria, Kenya. *Sci. Rep.* **6**, (2016).
25. WHO. WHO | World malaria report 2017. WHO (2018).
26. Lin, J. T., Saunders, D. L. & Meshnick, S. R. The role of submicroscopic parasitemia in malaria transmission: what is the evidence? *TRENDS Parasitol.* **30**, 183–190 (2014).
27. Gonçalves, B. P. *et al.* Examining the human infectious reservoir for Plasmodium falciparum malaria in areas of differing transmission intensity. *Nat. Commun.* **8**, 1133 (2017).
28. Sharp, S. J. & Thompson, S. G. Analysing the relationship between treatment effect and underlying risk in meta-analysis: comparison and development of approaches. *Stat. Med.* **19**, 3251–3274 (2000).
29. Hornik, K., Leisch, F., Zeileis, A. & Plummer, M. JAGS: A Program for Analysis of Bayesian Graphical Models Using Gibbs Sampling.
30. Bhatt, S. *et al.* The effect of malaria control on Plasmodium falciparum in Africa between 2000 and 2015. *Nature* **526**, 207–211 (2015).
31. Tatem, A. J. & Smith, D. L. International population movements and regional Plasmodium falciparum malaria elimination strategies. *Proc. Natl. Acad. Sci. U. S. A.* **107**, 12222–7 (2010).
32. Tessema, S. *et al.* Using parasite genetic and human mobility data to infer local and cross-border malaria connectivity in Southern Africa. *Elife* **8**, (2019).
33. World Health Organisation. WHO | World Malaria Report 2014. (2015).
34. Coleman, R. E. *et al.* Infectivity of asymptomatic Plasmodium-infected human populations to Anopheles dirus mosquitoes in western Thailand. *J. Med. Entomol.* **41**, 201–8 (2004).
35. Lin, J. T. *et al.* Microscopic Plasmodium falciparum Gametocytemia and Infectivity to Mosquitoes in Cambodia. *J. Infect. Dis.* **213**, 1491–1494 (2016).
36. Bhatt, S. *et al.* The effect of malaria control on Plasmodium falciparum in Africa between 2000 and 2015. *Nature* **526**, 207–211 (2015).



37. Lin, J. T., Saunders, D. L. & Meshnick, S. R. The role of submicroscopic parasitemia in malaria transmission: what is the evidence? *Trends Parasitol.* **30**, 183–190 (2014).
38. Cotter, C. *et al.* The changing epidemiology of malaria elimination: new strategies for new challenges. *Lancet* **382**, 900–911 (2013).
39. Carneiro, I. *et al.* Age-patterns of malaria vary with severity, transmission intensity and seasonality in sub-Saharan Africa: a systematic review and pooled analysis. *PLoS One* **5**, e8988 (2010).
40. Rodriguez-Barraquer, I. *et al.* Quantification of anti-parasite and anti-disease immunity to malaria as a function of age and exposure. *Elife* **7**, (2018).
41. Drakeley, C., Gonçalves, B., Okell, L. & Slater, H. Understanding the Importance of Asymptomatic and Low-Density Infections for Malaria Elimination. in *intechopen.com* (2018).
42. Koepfli, C. *et al.* Blood-Stage Parasitaemia and Age Determine Plasmodium falciparum and P-vivax Gametocyaemia in Papua New Guinea. *PLoS One* **10**, (2015).
43. Griffin, J. T., Ferguson, N. M. & Ghani, A. C. Estimates of the changing age-burden of Plasmodium falciparum malaria disease in sub-Saharan Africa. *Nat. Commun.* **5**, 3136 (2014).
44. Brasseur, P. *et al.* Changing patterns of malaria during 1996-2010 in an area of moderate transmission in Southern Senegal. *Malar. J.* **10**, 203 (2011).
45. Ceesay, S. J. *et al.* Changes in malaria indices between 1999 and 2007 in The Gambia: a retrospective analysis. *Lancet* **372**, 1545–1554 (2008).
46. Murray, L. *et al.* Multiplication rate variation in the human malaria parasite Plasmodium falciparum. *Sci. Rep.* **7**, 6436 (2017).
47. Kiwanuka, G. N. Genetic diversity in Plasmodium falciparum merozoite surface protein 1 and 2 coding genes and its implications in malaria epidemiology: a review of published studies from 1997-2007. *J. Vector Borne Dis.* **46**, 1–12 (2009).
48. Slater, H. *et al.* The density, temporal dynamics and infectiousness of subpatent P. falciparum infections. *Nat. Commun. (In Press)* (2019).
49. Smith, T. *et al.* Absence of seasonal variation in malaria parasitaemia in an area of intense seasonal transmission. *Acta Trop.* **54**, 55–72 (1993).
50. Mosha, J. F. *et al.* Epidemiology of subpatent Plasmodium falciparum infection: implications for detection of hotspots with imperfect diagnostics. *Malar. J.* **12**, (2013).
51. Roh, M. E. *et al.* High Genetic Diversity of Plasmodium falciparum in the Low-Transmission Setting of the Kingdom of Eswatini. *J. Infect. Dis.* **220**, 1346–1354 (2019).
52. Bogreau, H. *et al.* Genetic diversity and structure of African Plasmodium falciparum populations in urban and rural areas. *Am. J. Trop. Med. Hyg.* **74**, 953–9 (2006).
53. Chen, I., Cooney, R., Feachem, R. G. A., Lal, A. & Mpanju-Shumbusho, W. The Lancet Commission on malaria eradication. *Lancet (London, England)* **391**, 1556–1558 (2018).
